# Supplementary material for: NSAIDs Ibuprofen, Indometacin, and Diclofenac do not interact with Farnesoid X Receptor
Source: PubMed Central journal article supplement (PMC4589779; doi:10.1038/srep14782), 2015-10-01

# NSAIDS IBUPROFEN, INDOMETACIN, AND DICLOFENAC DO NOT INTERACT WITH FARNESOID X RECEPTOR

Jurema Schmidt<sup>1</sup>, Franca-Maria Klingler<sup>1</sup>, Ewgenji Proschak<sup>1</sup>, Dieter Steinhilber<sup>1</sup>, Manfred Schubert-Zsilavecz<sup>1</sup>, Daniel Merk<sup>1\*</sup>

<sup>1</sup> Institute of Pharmaceutical Chemistry, Goethe University Frankfurt, Max-von-Laue-Str. 9, 60438 Frankfurt, Germany

\* merk@pharmchem.uni-frankfurt.de

## - SUPPORTING INFORMATION -

Thermal shift data (n=4, each figure represents one independent repeat)

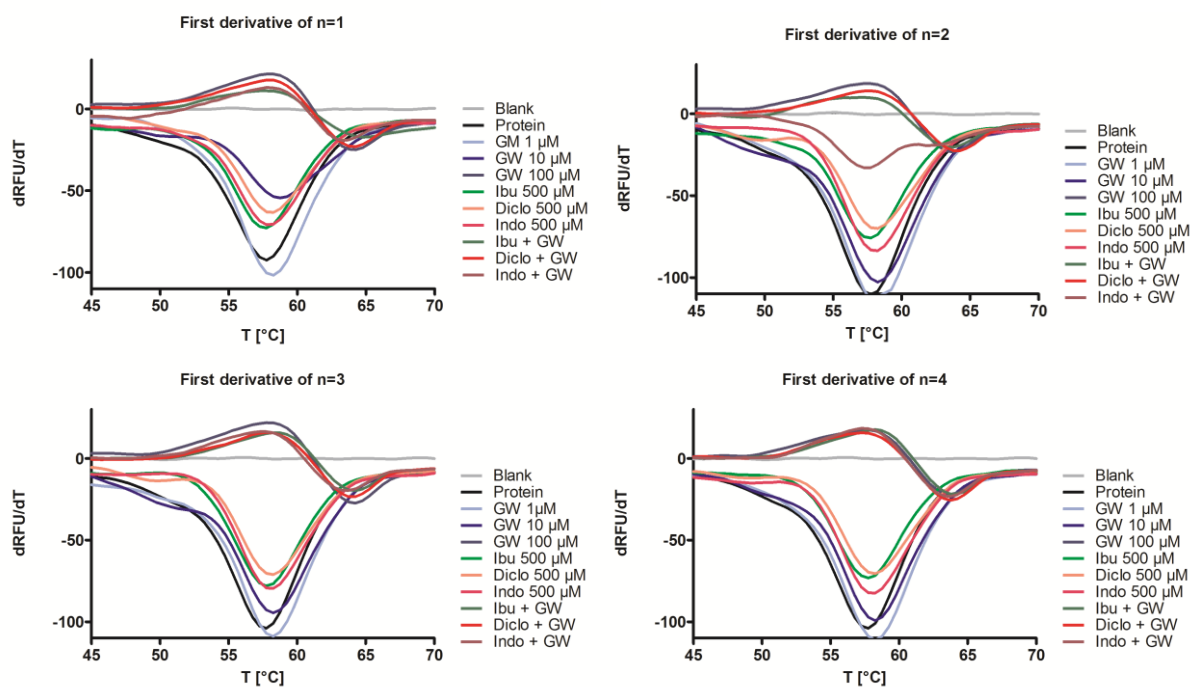

Supplement: srep14782-s1.pdf [file srep14782-s1.pdf]
